# Supplementary material for: Race-specific coregulatory and transcriptomic profiles associated with DNA methylation and androgen receptor in prostate cancer
Source: Springer Nature journal article supplement (doi:10.1186/s13073-024-01323-6), 2024-04-02
Supplement: 13073_2024_1323_MOESM1_ESM.pdf [file 13073_2024_1323_MOESM1_ESM.pdf]

**Table S1 Demographics for all samples analyzed for DNA methylation and RNA sequencing**

|                        |                | <b>AA N(%)</b> | <b>EA N(%)</b> | <b>Overall</b> | <b>P-value</b> |
|------------------------|----------------|----------------|----------------|----------------|----------------|
| Overall                | N (%)          | 35 (46.1)      | 41 (53.9)      | 76 (100%)      |                |
| Age at Diagnosis       | Mean/Std/N     | 57.2/7.9/35    | 57.8/6.6/41    | 57.5/7.2/76    | 0.707          |
|                        | Median/Min/Max | 57.0/44.0/73.0 | 57.0/45.0/72.0 | 57.0/44.0/73.0 |                |
| Smoking Status         | Never          | 13 (37.1%)     | 18 (43.9%)     | 31 (40.8%)     | 0.133          |
|                        | Former         | 11 (31.4%)     | 18 (43.9%)     | 29 (38.2%)     |                |
|                        | Current        | 11 (31.4%)     | 5 (12.2%)      | 16 (21.1%)     |                |
| Clinical Gleason score | < 7            | 8 (22.9%)      | 12 (29.3%)     | 20 (26.3%)     | 0.724          |
|                        | 7              | 21 (60.0%)     | 24 (58.5%)     | 45 (59.2%)     |                |
|                        | > 7            | 6 (17.1%)      | 5 (12.2%)      | 11 (14.5%)     |                |
| Pre-RP PSA             | Mean/Std/N     | 11.0/14.1/35   | 8.9/6.1/41     | 9.8/10.6/76    | 0.621          |
|                        | Median/Min/Max | 6.9/2.8/82.1   | 6.4/1.7/25.9   | 6.9/1.7/82.1   |                |
| PSA*                   | < 10           | 29 (82.9%)     | 29 (70.7%)     | 58 (76.3%)     | 0.221          |
|                        | 10 to <20      | 2 (5.7%)       | 8 (19.5%)      | 10 (13.2%)     |                |
|                        | >= 20          | 4 (11.4%)      | 4 (9.8%)       | 8 (10.5%)      |                |
| Clinical T-stage       | cT1            | 19 (54.3%)     | 23 (56.1%)     | 42 (55.3%)     | 1.000          |
|                        | cT2            | 14 (40.0%)     | 16 (39.0%)     | 30 (39.5%)     |                |
|                        | cT3            | 2 (5.7%)       | 2 (4.9%)       | 4 (5.3%)       |                |
| Grade                  | II             | 4 (11.4%)      | 6 (15.0%)      | 10 (13.3%)     | 0.742          |
|                        | III            | 31 (88.6%)     | 34 (85.0%)     | 65 (86.7%)     |                |
| Pathological Gleason   | < 7            | 4 (11.4%)      | 4 (9.8%)       | 8 (10.5%)      | 0.814          |
|                        | 7              | 28 (80.0%)     | 35 (85.4%)     | 63 (82.9%)     |                |
|                        | > 7            | 3 (8.6%)       | 2 (4.9%)       | 5 (6.6%)       |                |
| Pathological T-stage   | pT2            | 19 (54.3%)     | 22 (53.7%)     | 41 (53.9%)     | 0.271          |
|                        | pT3            | 12 (34.3%)     | 18 (43.9%)     | 30 (39.5%)     |                |
|                        | pT4            | 4 (11.4%)      | 1 (2.4%)       | 5 (6.6%)       |                |

**Table S2 Demographics for overlapping samples analyzed by both DNA methylation and RNA sequencing**

|                        |                | EA N(%)        | AA N(%)        | Overall        | P-value |
|------------------------|----------------|----------------|----------------|----------------|---------|
| Overall                | N              | 32 (50.8)      | 31 (49.2)      | 63 (100%)      |         |
| Age at Diagnosis       | Mean/Std/N     | 58.3/6.7/32    | 56.4/7.5/31    | 57.4/7.1/63    | 0.321   |
|                        | Median/Min/Max | 57.5/45.0/72.0 | 56.0/44.0/73.0 | 57.0/44.0/73.0 |         |
| Smoking Status         | Never          | 15 (46.9%)     | 12 (38.7%)     | 27 (42.9%)     | 0.039   |
|                        | Former         | 14 (43.8%)     | 8 (25.8%)      | 22 (34.9%)     |         |
|                        | Current        | 3 (9.4%)       | 11 (35.5%)     | 14 (22.2%)     |         |
| Clinical Gleason score | < 7            | 9 (28.1%)      | 8 (25.8%)      | 17 (27.0%)     | 0.819   |
|                        | 7              | 20 (62.5%)     | 18 (58.1%)     | 38 (60.3%)     |         |
|                        | > 7            | 3 (9.4%)       | 5 (16.1%)      | 8 (12.7%)      |         |
| Pre-RP PSA             | Mean/Std/N     | 8.6/5.7/32     | 10.8/14.7/31   | 9.7/11.1/63    | 0.815   |
|                        | Median/Min/Max | 6.7/1.7/25.9   | 6.9/2.8/82.1   | 6.9/1.7/82.1   |         |
| PSA*                   | < 10           | 22 (68.8%)     | 26 (83.9%)     | 48 (76.2%)     | 0.141   |
|                        | 20-Oct         | 8 (25.0%)      | 2 (6.5%)       | 10 (15.9%)     |         |
|                        | >= 20          | 2 (6.3%)       | 3 (9.7%)       | 5 (7.9%)       |         |
| Clinical T-stage       | cT1            | 19 (59.4%)     | 16 (51.6%)     | 35 (55.6%)     | 0.845   |
|                        | cT2            | 11 (34.4%)     | 13 (41.9%)     | 24 (38.1%)     |         |
|                        | cT3            | 2 (6.3%)       | 2 (6.5%)       | 4 (6.3%)       |         |
| Grade                  | II             | 5 (16.1%)      | 4 (12.9%)      | 9 (14.5%)      | 1       |
|                        | III            | 26 (83.9%)     | 27 (87.1%)     | 53 (85.5%)     |         |
| Pathological Gleason   | < 7            | 4 (12.5%)      | 4 (12.9%)      | 8 (12.7%)      | 0.903   |
|                        | 7              | 26 (81.3%)     | 24 (77.4%)     | 50 (79.4%)     |         |
|                        | > 7            | 2 (6.3%)       | 3 (9.7%)       | 5 (7.9%)       |         |
| Pathological T-stage   | pT2            | 17 (53.1%)     | 18 (58.1%)     | 35 (55.6%)     | 0.232   |
|                        | pT3            | 14 (43.8%)     | 9 (29.0%)      | 23 (36.5%)     |         |
|                        | pT4            | 1 (3.1%)       | 4 (12.9%)      | 5 (7.9%)       |         |

**Table S3. Demographics in TMA**

|                     |                | <b>AA N (%)</b> | <b>EA N (%)</b> | <b>Overall</b> | <b>P-value</b> |
|---------------------|----------------|-----------------|-----------------|----------------|----------------|
| Overall             | N              | 107 (44.6)      | 133 (55.4)      | 253 (100%)     |                |
| Age at Diagnosis    | Mean/Std/N     | 56.0/7.1/107    | 59.7/6.7/133    | 58.1/7.1/240   | <.001          |
|                     | Median/Min/Max | 55.0/41.0/70.0  | 60.0/41.0/78.0  | 58.0/41.0/78.0 |                |
| Age*                | < 55           | 46 (43.0%)      | 29 (21.8%)      | 80 (31.6%)     | <.001          |
|                     | >= 55          | 61 (57.0%)      | 104 (78.2%)     | 173 (68.4%)    |                |
| Tobacco Use         | None           | 42 (39.3%)      | 49 (37.4%)      | 92 (38.5%)     | <0.01          |
|                     | Former         | 32 (29.9%)      | 63 (48.1%)      | 95 (39.7%)     |                |
|                     | Current        | 33 (30.8%)      | 19 (14.5%)      | 52 (21.8%)     |                |
| pre-RP PSA          | Mean/Std/N     | 9.1/10.3/106    | 9.1/10.7/132    | 9.1/10.5/238   | 0.48           |
|                     | Median/Min/Max | 6.5/0.7/82.1    | 6.3/0.1/87.9    | 6.3/0.1/87.9   |                |
| PSA*                | < 4            | 16 (15.1%)      | 24 (18.2%)      | 40 (16.7%)     | 0.92           |
|                     | 4 to <10       | 70 (66.0%)      | 82 (62.1%)      | 152 (63.6%)    |                |
|                     | 10 to <20      | 12 (11.3%)      | 16 (12.1%)      | 28 (11.7%)     |                |
|                     | >= 20          | 8 (7.5%)        | 10 (7.6%)       | 19 (7.9%)      |                |
| Grade               | Grade II       | 32 (29.9%)      | 33 (24.8%)      | 65 (25.7%)     | 0.39           |
|                     | Grade III      | 75 (70.1%)      | 100 (75.2%)     | 188 (74.3%)    |                |
| Clinical Gleason    | <= 3+4         | 61 (57.0%)      | 76 (58.0%)      | 138 (57.7%)    | 0.90           |
|                     | >= 4+3         | 46 (43.0%)      | 55 (42.0%)      | 101 (42.3%)    |                |
| Clinical T-stage    | cT1            | 71 (68.9%)      | 90 (68.7%)      | 162 (68.9%)    | 0.53           |
|                     | cT2            | 28 (27.2%)      | 39 (29.8%)      | 67 (28.5%)     |                |
|                     | cT3            | 4 (3.9%)        | 2 (1.5%)        | 6 (2.6%)       |                |
| Path Gleason        | < 3+4          | 45 (42.5%)      | 49 (37.1%)      | 94 (39.3%)     | 0.43           |
|                     | > 4+3          | 61 (57.5%)      | 83 (62.9%)      | 145 (60.7%)    |                |
| Path T-stage        | pT2            | 71 (68.9%)      | 75 (57.7%)      | 146 (62.4%)    | 0.23           |
|                     | pT3            | 27 (26.2%)      | 46 (35.4%)      | 74 (31.6%)     |                |
|                     | pT4            | 5 (4.9%)        | 9 (6.9%)        | 14 (6.0%)      |                |
| Persistent Disease? | No             | 84 (78.5%)      | 106 (79.7%)     | 200 (79.1%)    | 0.87           |
|                     | Yes            | 23 (21.5%)      | 27 (20.3%)      | 53 (20.9%)     |                |

**Table S4. Percent AR positive nuclei in prostate tissues from AA and EA men**

| Percent of AR+ve nuclei                     |           | AA |               |                 | EA  |               |                 | Interaction <i>P</i> -value |
|---------------------------------------------|-----------|----|---------------|-----------------|-----|---------------|-----------------|-----------------------------|
| Tumor                                       |           | n  | Mean (SD)     | <i>P</i> -value | n   | Mean (SD)     | <i>P</i> -value |                             |
| Age (range)                                 | <55       | 46 | 77.59 (11.80) | 0.49            | 29  | 80.63 (13.93) | 0.07            | 0.28                        |
|                                             | ≥ 55      | 61 | 75.80 (14.28) |                 | 104 | 74.07 (17.86) |                 |                             |
| PSA (range, ng/mL)                          | <4        | 16 | 72.18 (13.65) | 0.15            | 24  | 75.47 (13.15) | 0.96            | 0.38                        |
|                                             | 4 to <10  | 70 | 77.91 (12.02) |                 | 82  | 75.18 (18.91) |                 |                             |
|                                             | 10 to <20 | 12 | 72.53 (19.51) |                 | 16  | 77.68 (15.49) |                 |                             |
|                                             | ≥ 20      | 8  | 82.51 (5.55)  |                 | 10  | 74.49 (17.08) |                 |                             |
| Clinical Gleason score                      | ≤ 3+4     | 61 | 77.61 (12.30) | 0.35            | 76  | 73.10 (17.07) | 0.06            | <0.05                       |
|                                             | ≥ 4+3     | 46 | 75.19 (14.43) |                 | 55  | 78.82 (17.40) |                 |                             |
| Pathological T-stage                        | pT2       | 71 | 77.21 (12.59) | 0.87            | 75  | 75.44 (15.87) | 0.7             | 0.70                        |
|                                             | pT3       | 27 | 78.58 (11.72) |                 | 46  | 74.41 (19.98) |                 |                             |
|                                             | pT4       | 5  | 76.52 (9.36)  |                 | 9   | 79.72 (9.47)  |                 |                             |
| Persistent disease                          | No        | 84 | 76.34 (12.96) | 0.74            | 106 | 75.20 (17.17) | 0.69            | 0.93                        |
|                                             | Yes       | 23 | 77.39 (14.49) |                 | 27  | 76.70 (17.81) |                 |                             |
| Hormone therapy after radical prostatectomy | No        | 86 | 76.62 (13.26) | 0.93            | 100 | 75.32 (17.07) | 0.83            | 0.84                        |
|                                             | Yes       | 21 | 76.35 (13.49) |                 | 33  | 76.06 (18.02) |                 |                             |
| Percent of AR+ve nuclei                     |           | AA |               |                 | EA  |               |                 | Interaction <i>P</i> -value |
| Adjacent non-tumor                          |           | n  | Mean (SD)     | <i>P</i> -value | n   | Mean (SD)     | <i>P</i> -value |                             |
| Age (range)                                 | <55       | 46 | 80.19 (9.90)  | 0.16            | 29  | 78.09 (16.58) | <0.05           | 0.22                        |
|                                             | ≥ 55      | 61 | 76.63 (14.82) |                 | 104 | 68.68 (19.28) |                 |                             |
| PSA (range, ng/mL)                          | <4        | 16 | 74.41 (14.14) | <0.05           | 24  | 69.00 (12.61) | 0.97            | 0.5                         |
|                                             | 4 to <10  | 70 | 80.57 (10.70) |                 | 82  | 71.06 (20.26) |                 |                             |
|                                             | 10 to <20 | 12 | 70.36 (21.56) |                 | 16  | 70.71 (20.98) |                 |                             |
|                                             | ≥ 20      | 8  | 75.48 (7.94)  |                 | 10  | 71.38 (21.87) |                 |                             |
| Clinical Gleason score                      | ≤ 3+4     | 61 | 76.66 (12.55) | 0.17            | 76  | 69.95 (19.27) | 0.69            | 0.63                        |
|                                             | ≥ 4+3     | 46 | 80.15 (13.45) |                 | 55  | 71.31 (19.07) |                 |                             |
| Pathological T-stage                        | pT2       | 71 | 79.78 (11.40) | 0.28            | 75  | 71.28 (13.34) | 0.84            | 0.53                        |
|                                             | pT3       | 27 | 79.82 (9.59)  |                 | 46  | 69.34 (25.53) |                 |                             |
|                                             | pT4       | 5  | 71.62 (14.02) |                 | 9   | 72.18 (24.53) |                 |                             |
| Persistent disease                          | No        | 84 | 79.27 (11.86) | 0.09            | 106 | 70.05 (18.91) | 0.42            | 0.11                        |
|                                             | Yes       | 23 | 74.09 (16.18) |                 | 27  | 73.39 (19.80) |                 |                             |
| Hormone therapy after radical prostatectomy | No        | 86 | 80.45 (10.74) | <0.001          | 100 | 70.59 (17.92) | 0.88            | <0.05                       |
|                                             | Yes       | 21 | 68.78 (17.03) |                 | 33  | 71.15 (22.47) |                 |                             |

PSA: prostate specific antigen, n: number of samples, SD: standard deviation

**Table S5. Differentially expressed nodes after AR KO between AA and EA men**

| Node (Roswell Park cohort) | Pathway          | % Change in AUC in AA men | % Change in AUC in EA men | <i>P</i> -value | Adjusted <i>P</i> -value |
|----------------------------|------------------|---------------------------|---------------------------|-----------------|--------------------------|
|                            |                  | Median (Q1 – Q3)          | Median (Q1 – Q3)          |                 |                          |
| SMAD                       | TGFb pathway     | 48.5 (43.3 – 120.3)       | 15.3 (3.6 – 46.3)         | 0.0401          | 0.12                     |
| IDH1                       | Nutrient pathway | 34.2 (17.8 – 47.7)        | 9.6 (3.94 – 13.5)         | 0.00373         | 0.0629                   |
| AR_ERG                     | AR pathway       | -97.4 (-98.4 – -96.2)     | -93.4 (-95.6 – -82.7)     | 0.0140          | 0.041                    |
| ZBTB17                     | Cell cycle       | -95.8 (-97.8 – -89.0)     | -78.5 (-84.9 – -50.6)     | 0.0401          | 0.252                    |

| Node (TCGA)  | Pathway          | % Change in AUC in AA men | % Change in AUC in EA men | <i>P</i> -value | Adjusted <i>P</i> -value |
|--------------|------------------|---------------------------|---------------------------|-----------------|--------------------------|
|              |                  | Median (Q1 – Q3)          | Median (Q1 – Q3)          |                 |                          |
| SMAD         | TGFb pathway     | 51.9 (33.3 – 76.4)        | 28.0 (12.1 – 61.3)        | 0.0108          | 0.0024                   |
| IDH1         | Nutrient pathway | 19.9 (8.83 – 36.3)        | 8.90 (1.88 – 20.7)        | 0.000313        | 0.0051                   |
| E2F1         | Cell cycle       | -96.8 (-98.4 – -88.0)     | -91.0 (-97.7 – -67.1)     | 0.000817        | 0.0378                   |
| Beta catenin | WNT pathway      | -89.5(-95.4 – -44.2)      | -65.7 (-88.3 – -24.8)     | 0.0153          | 0.107                    |

Table S6. Top GSEA pathways with hazard ratios based on GSA scores for early/elderly and race comparisons

Table with 15 columns: Comparison, Names, NES, Hit, Hit\_AAR, Hit\_ASE, Hit\_AAP-value, Hit\_EAR, Hit\_EAS, Hit\_EAP-value, Total\_EarlyHit, Total\_EarlySE, Total\_EarlyP-value, Hit\_AAR, Hit\_ASE, Hit\_AAP-value, Total\_EarlyHit, Total\_EarlySE, Total\_EarlyP-value. The table lists various GSEA pathways and their associated statistical values for early/elderly and race comparisons.

## **Supplementary Table legends**

**Table S1** Demographics for samples analyzed for DNA methylation and RNA sequencing.

**Table S2** Demographics for overlapping samples analyzed by both DNA methylation and RNA sequencing.

**Table S3** Demographics of clinical samples included in the TMA.

**Table S4** Percent AR positive nuclei in prostate tissues from AA and EA men.

**Table S5** Differentially expressed nodes after AR KO between AA and EA men.

**Table S6** Hazard ratios for GSEA pathways.
