# Supplementary material for: Race-specific coregulatory and transcriptomic profiles associated with DNA methylation and androgen receptor in prostate cancer
Source: Springer Nature journal article supplement (doi:10.1186/s13073-024-01323-6), 2024-04-02
Supplement: 13073_2024_1323_MOESM2_ESM.pdf [file 13073_2024_1323_MOESM2_ESM.pdf]

# Figure S1

A.

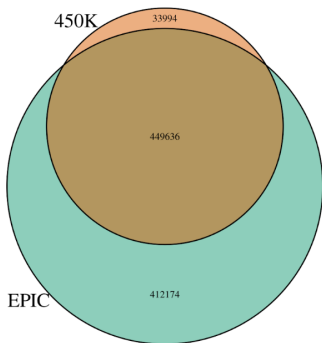

B.

minfi Merged Data  
Before Batch Correction

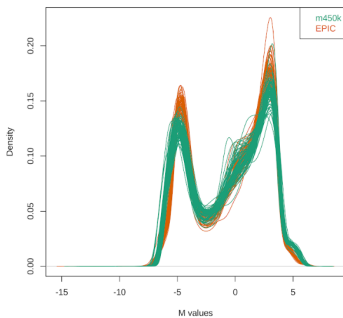

C.

minfi Merged Data  
After Batch Correction

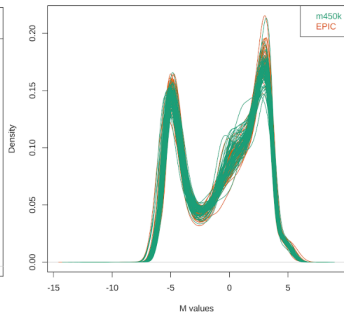

Figure S2

A.

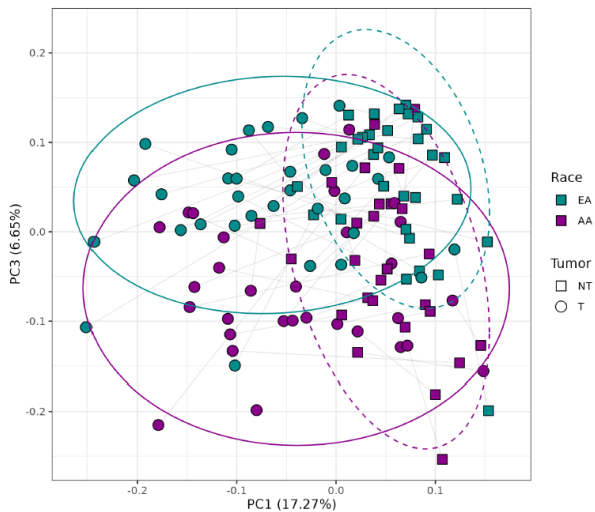

B.

EA\_vs\_AA\_Race  
Top 1000 DMRs

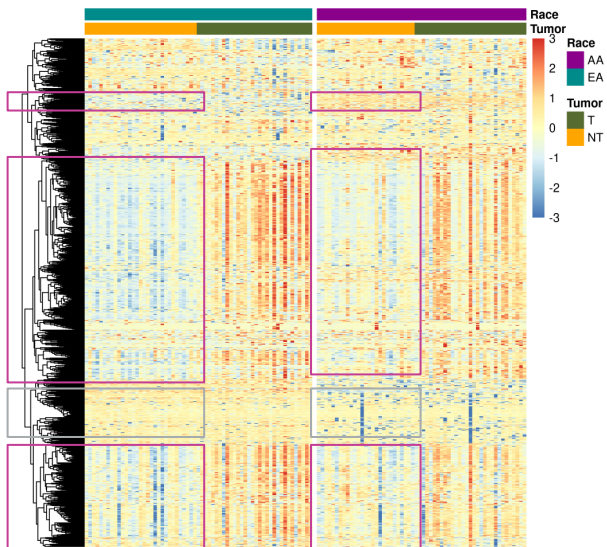

Figure S3

**A.** African American Vs European American  
Tumor  
Differentially methylated loci

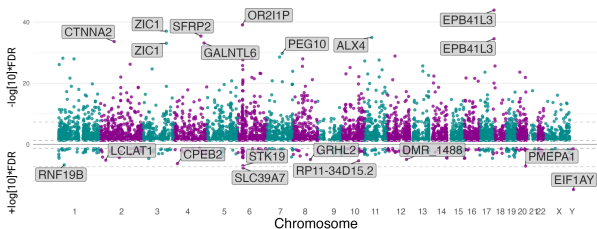

**B.** African American Vs European American  
Tumor  
LISA-derived chromatin remodelers and  
transcription factors

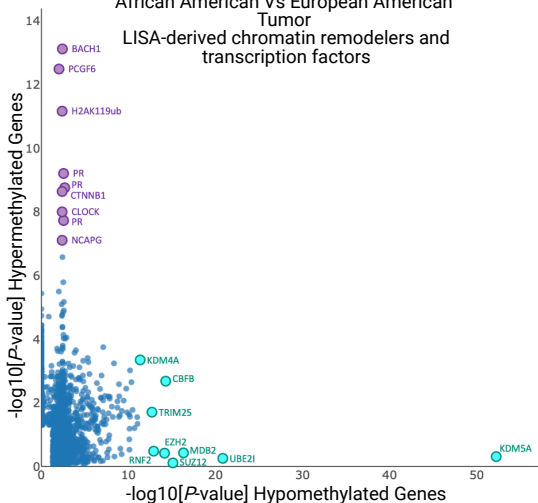

**Figure S4**

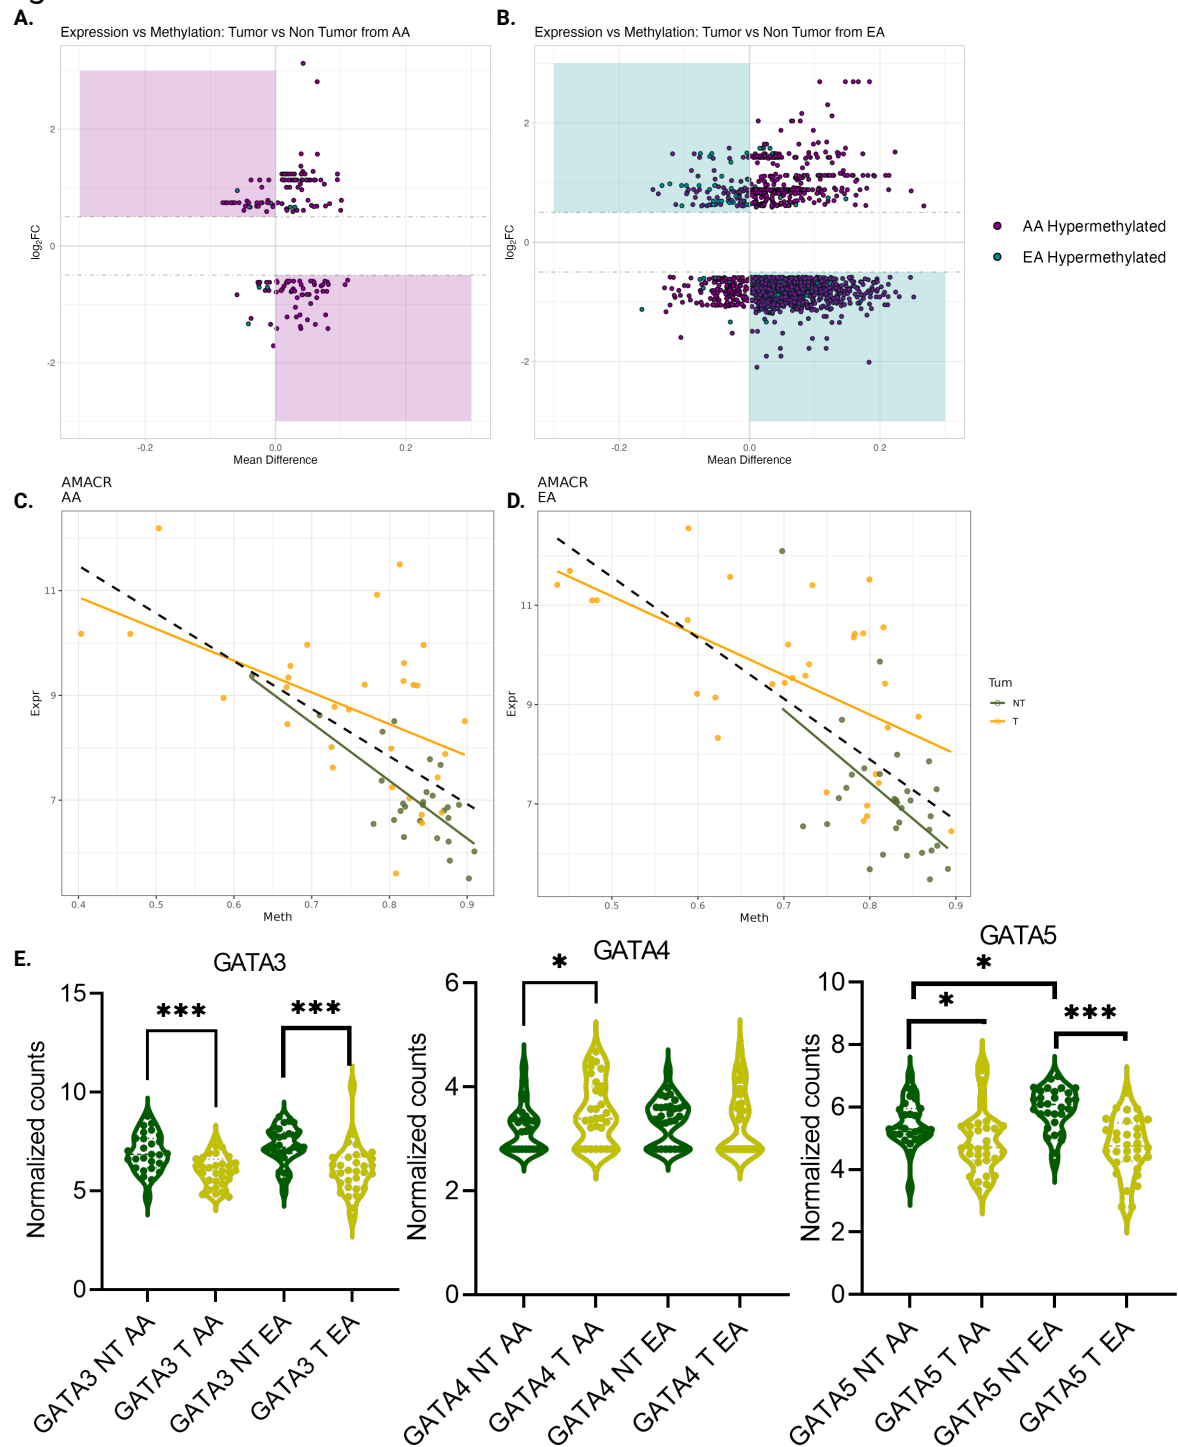

**Figure S5**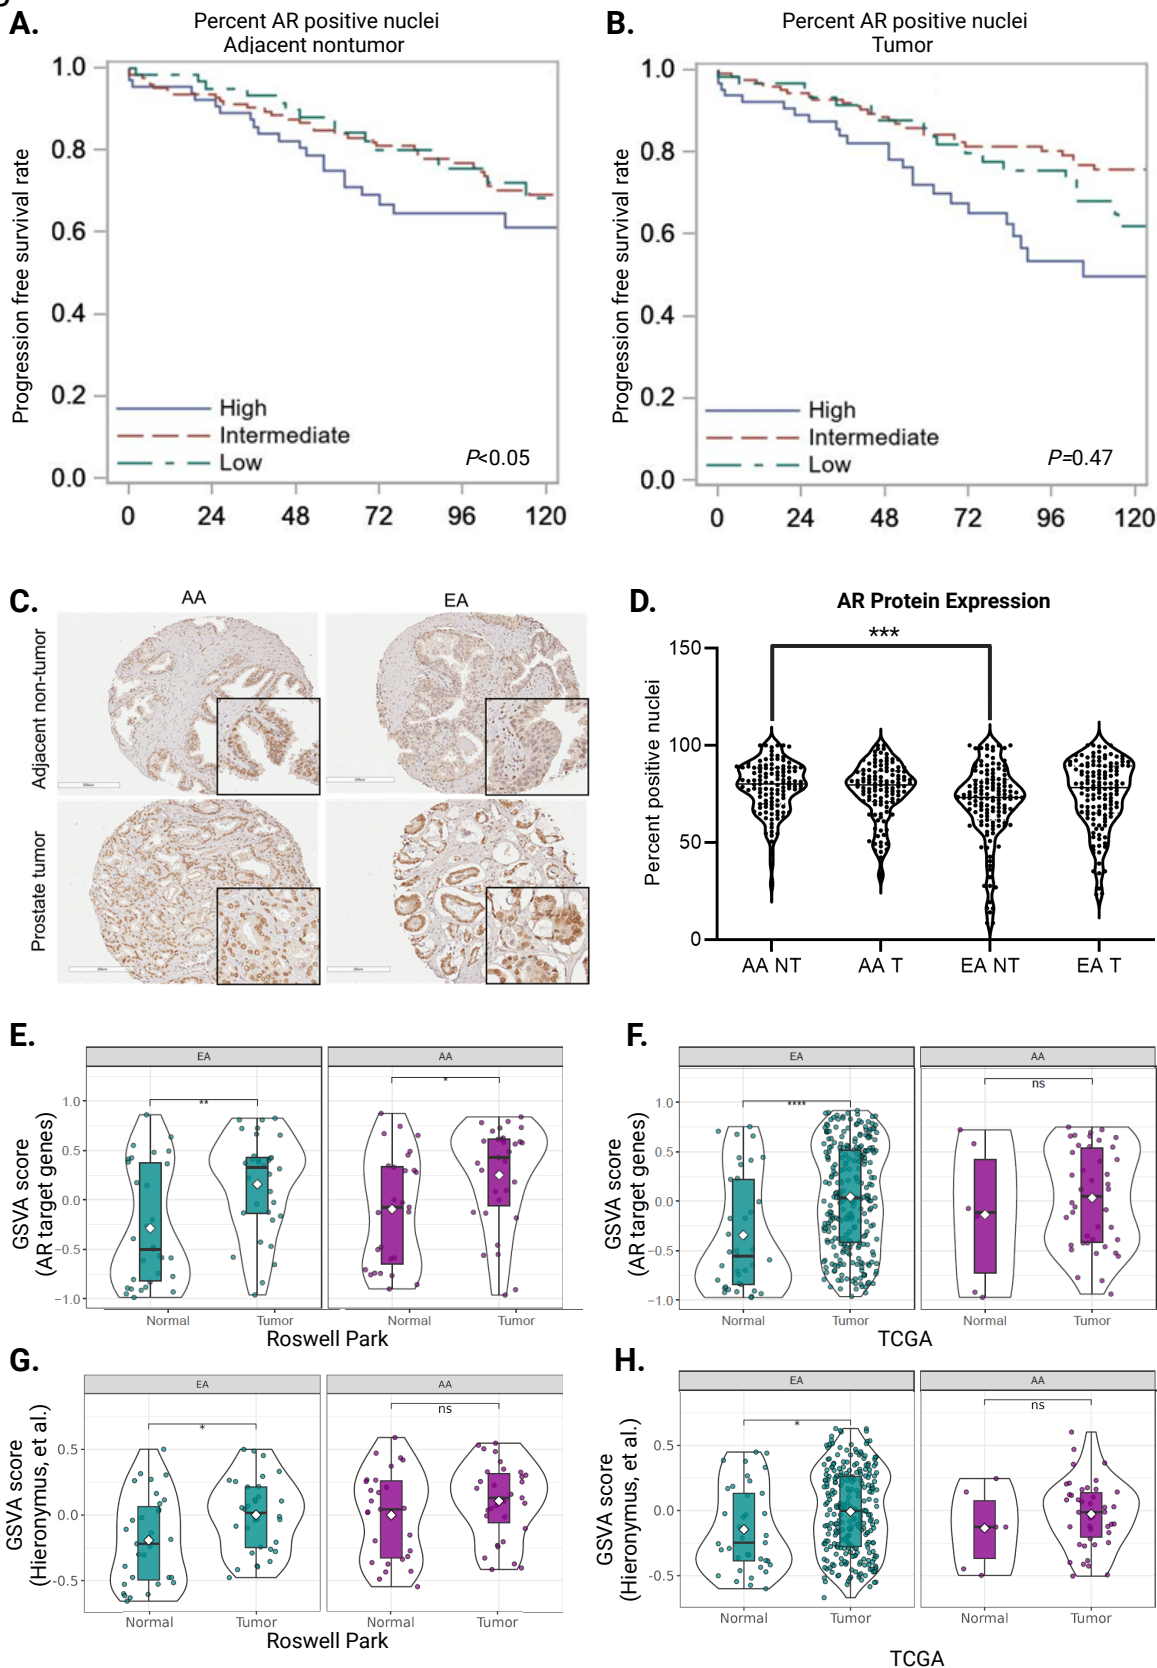

Figure S6

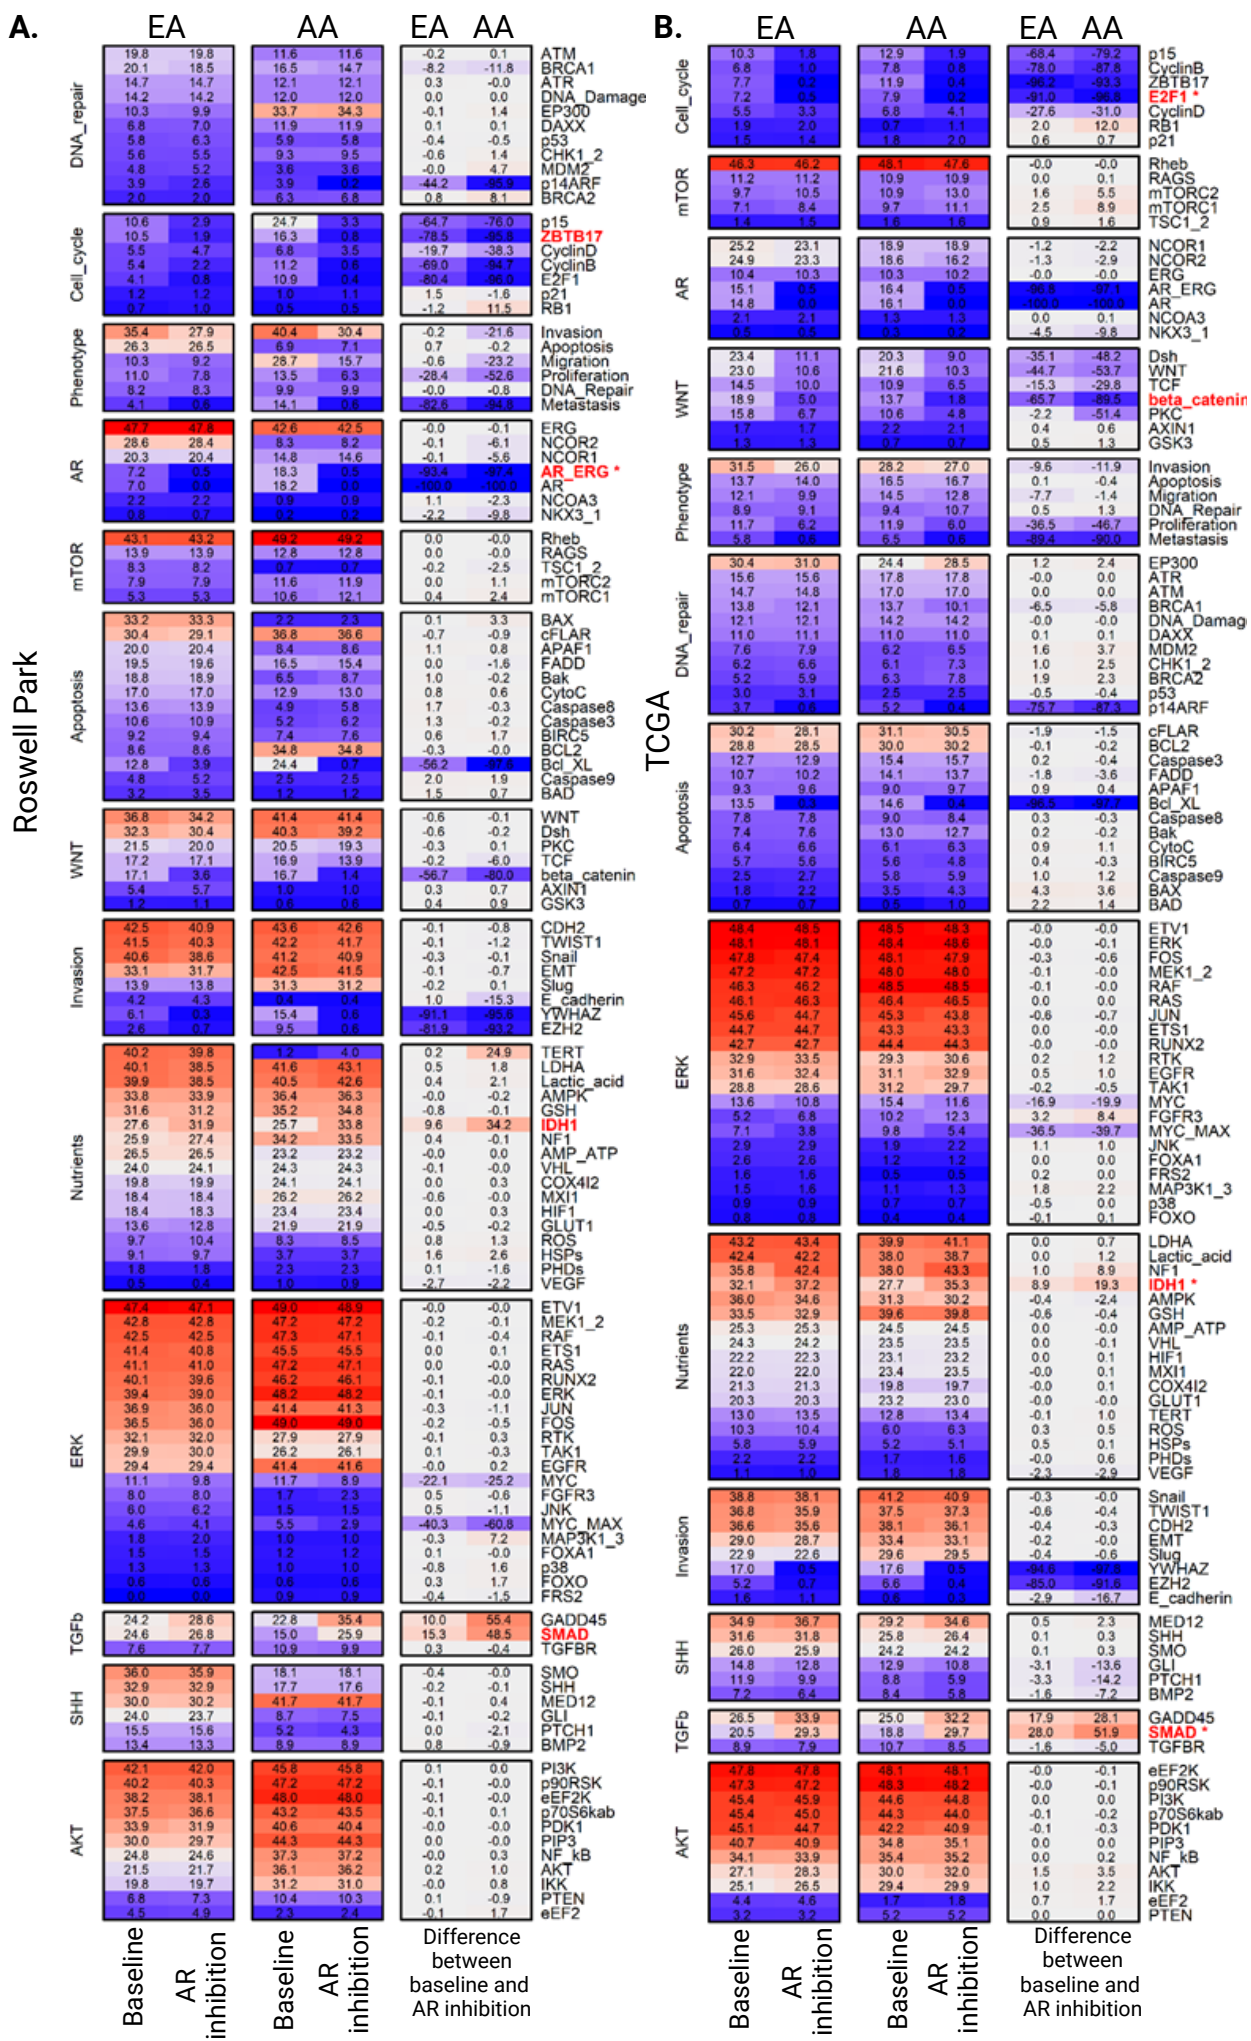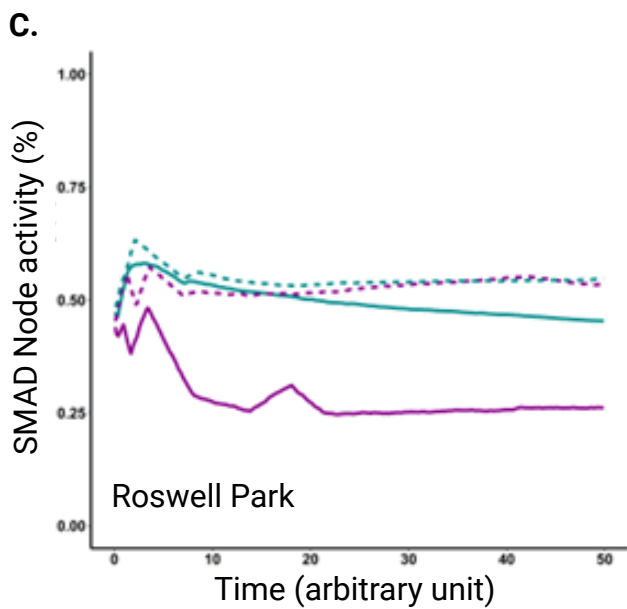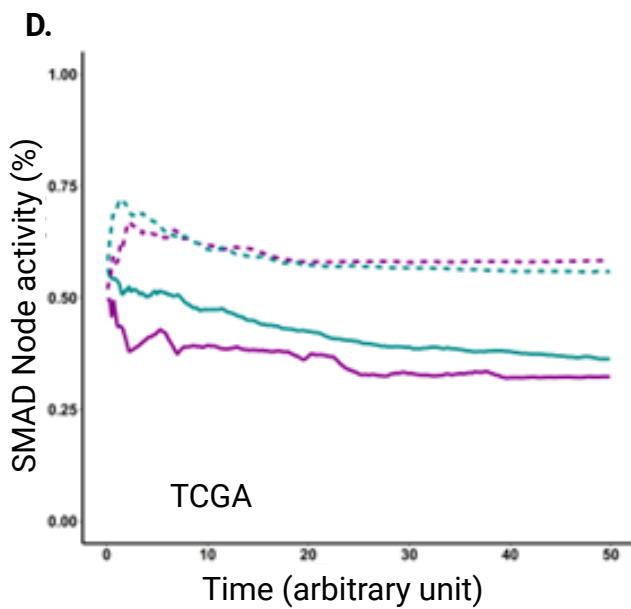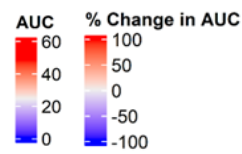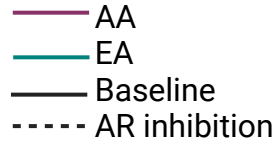

Figure S7

A.

Enrichment Scores of Immune Related Pathways, TCGA Data

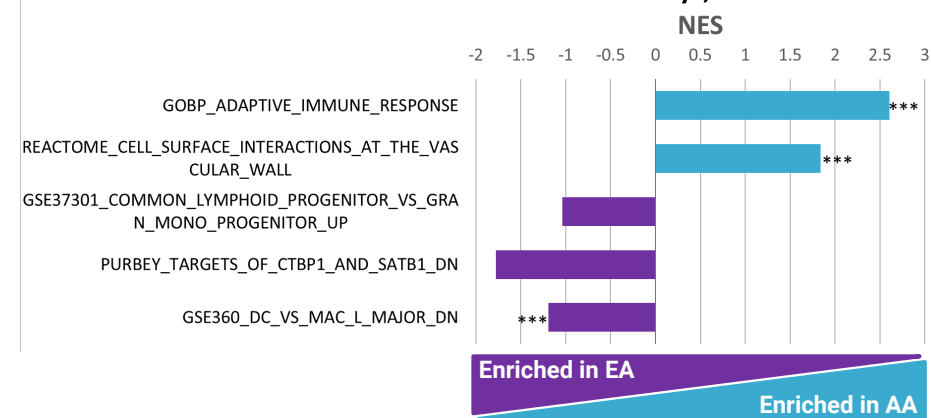

B.

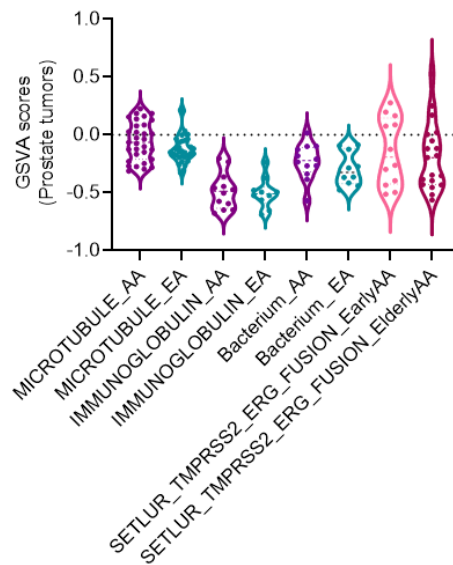

C.

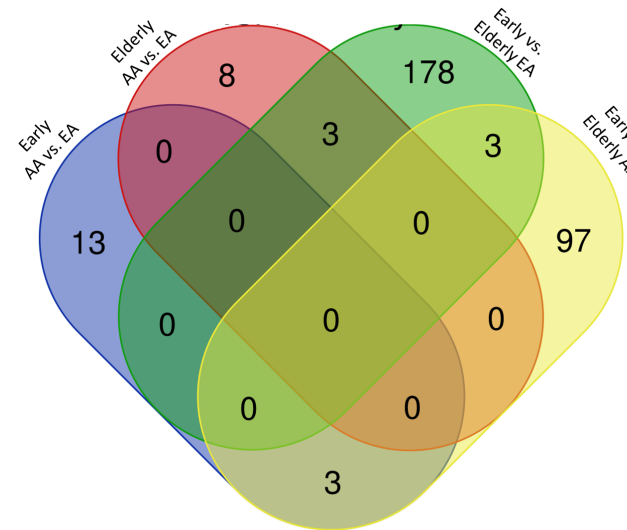

D.

Early EA vs Elderly EA

EnhancedVolcano

● NS

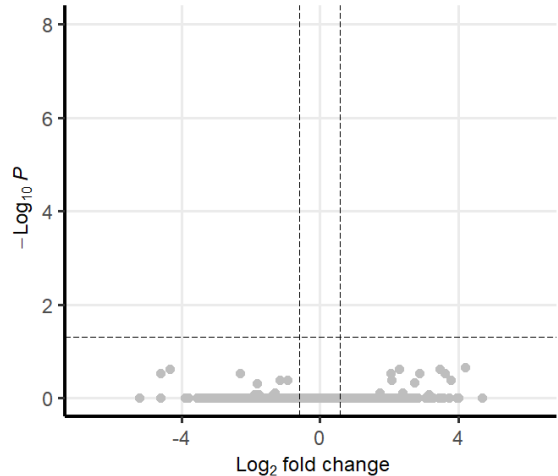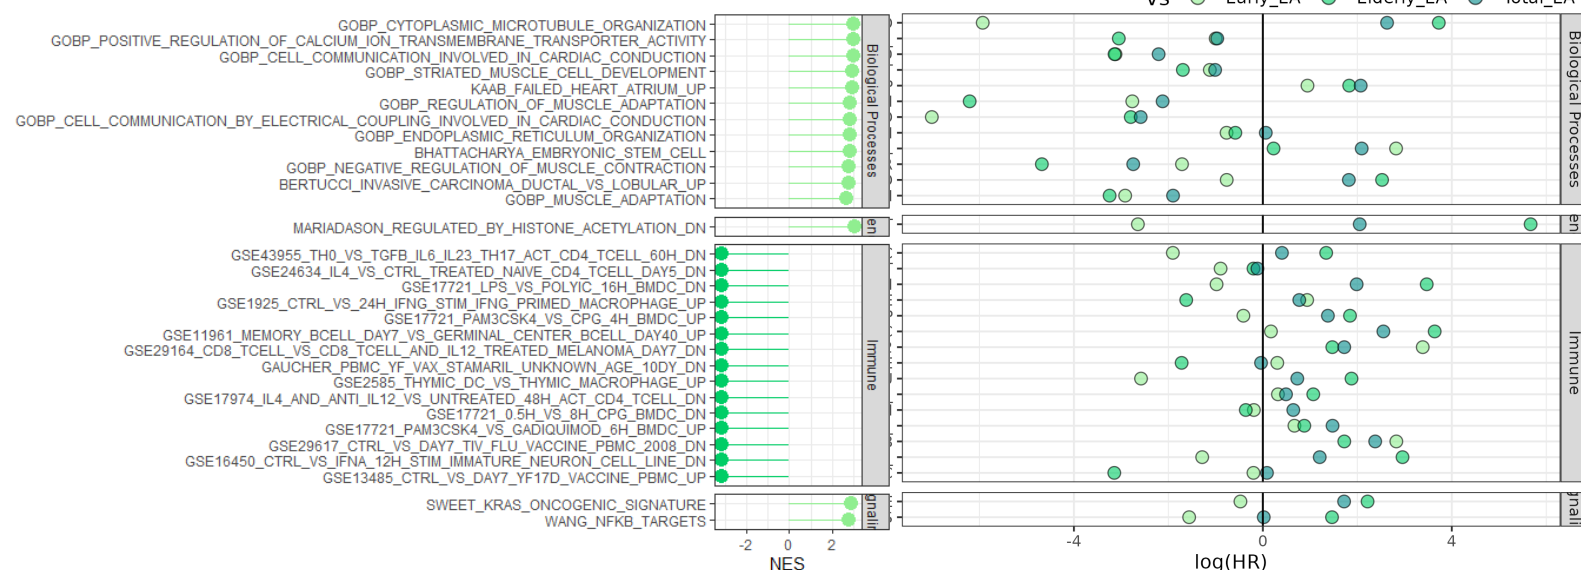

## Supplementary Figure Legends

**Figure S1 DNA methylation data obtained from 450K and EPIC arrays have large overlap and concordance.** **A.** Venn diagram depicting the number of probes on the 450K DNA methylation array (orange circle, n=483,630), the EPIC DNA methylation array (green circle, 861,810), and the number of probes overlapping between both arrays which were the only probes considered for downstream analysis (449,636). **B.** Density plot of M values output from minfi for both 450K and EPIC arrays prior to batch correction. **C.** Density plot of M values output from minfi for both 450K and EPIC arrays after batch correction, demonstrating a loss of batch effect.

**Figure S2 Race and tumor vs. non-tumor comparison of differentially methylated regions.** **A.** Principal component analysis (PCA) of DNA methylation profiles from prostate tumors and adjacent non-tumor tissue from AA and EA men. PCA plots show that tissues from AA and EA men are distinct, but there is no obvious separation between prostate cancer and adjacent non-tumor tissue. Solid lines represent 95% confidence ellipses for tumor samples, grouped by race (AA: Purple, EA: Blue) and dashed lines represent 95% confidence ellipses for no-tumor samples based on race (AA: Purple, EA: Blue) **B.** Heatmap representing top1000 differentially methylated regions in prostate tumors and adjacent non-tumor tissues from AA and EA men. Pink boxes represent groups of DMRs with increased DNA methylation in non-tumor tissues of AA samples compared to EA, and gray boxes represent groups of DMRs with decreased DNA methylation in non-tumor tissues of AA compared to EA samples.

**Figure S3 Differentially methylated regions between prostate tumors from AA and EA men reveal race-specific enrichment of pathways and transcript factors.** **A.** Manhattan plots representing differentially methylated regions in prostate tumors from AA and EA men across all



chromosome locations. **B.** Lisa-derived epigenetic regulators with binding enrichment in hypermethylated or hypomethylated genes in prostate tumors from AA compared to EA men.

**Figure S4 The relationship between DNA methylation and gene expression correlation are distinct in a subset of genes from prostate tumors between AA and EA men.** **A.** Comparisons between prostate tumors and adjacent non-tumor tissues of AA men. **B.** Comparisons between prostate tumors and adjacent non-tumor tissues of EA men. Each dot represents  $\rho$ , correlation coefficient, between differentially methylated regions (DMRs) and gene expression. *X-axis* represents the mean difference in DMRs, and *Y-axis* represents log fold change in gene expression. The shaded areas represent an inverse correlation between DNA methylation and gene expression. **C-D.** Negative correlation is observed between DNA methylation and AMACR gene expression in prostate cancer and adjacent non-tumor tissue from AA men (*left panel, C*) and EA men (*right panel, D*). *Y-axis* represents gene expression and *X-axis* represents DNA methylation. Each dot is the correlation estimate in each individual sample. **E.** Normalized counts from RNA-sequencing data of the GATA family members in tissues from AA and EA men with prostate cancer.

**Figure S5 Tumor AR transcriptional activity is upregulated when compared to normal prostate tissue despite similar nuclear AR protein expression in both.** **A-B.** Progression free survival was significantly worse in men with a higher percent of AR positive nuclei in adjacent non-tumor tissues (**A**) but not prostate tumors (**B**). **C.** Representative images of AR expression in prostate tumors and adjacent non-tumor tissues from AA and EA men. **D.** Violin plots show significantly higher AR-positive nuclei in adjacent non-tumor tissues from AA men than EA men. Each dot represents the average percent of positive AR nuclei in triplicate tissue cores. NT: Adjacent non-tumor tissue and T: Prostate tumors. Number of samples: AA = 107, EA = 133; \*\*\* $P < 0.001$ . **E.-F.** GSVA scores were calculated for AR transcriptional targets: *KLK2*, *KLK3*,

*TMPRSS2*, and *NKX3.1*. AR transcriptional activity calculated for normal (non-tumor) and tumor tissues of EA (left panel) and AA prostate tumors (right panel) are represented in the violin for the Roswell Park cohort (E) and the TCGA cohort (F) G.-H GSVA scores calculated for a 27-gene signature to represent AR transcriptional activity (Hieronymus et al., (2006)). AR transcriptional activity scores calculated from this gene signature for normal (non-tumor) and tumor tissues of EA (left) and AA (right) are represented in the violin for the Roswell Park cohort (G) and the TCGA cohort (H). Each dot represents a single sample; ns is non-significant. Each dot represents a single tissue. \* $P < 0.05$ , \*\* $P < 0.01$ , \*\*\* $P < 0.001$ .

**Figure S6 Simulation of AR inhibition in prostate cancer-specific Boolean network reveals significant changes in AR-associated transcriptional programs in prostate cancer from AA men. A. and B.** Changes in all the pathways included in the Boolean network before and after simulation of AR inhibition between race are represented in the heatmap for Roswell Park and TCGA cohort. *A*: Roswell Park clinical samples, *B*: TCGA clinical samples. Percent change in SMAD AUC (highlighted in red) was significantly different between prostate tumors from AA and EA men in both RP and TCGA clinical samples. Changes in AUC are represented by blue (down) and red (up). **C and D.** Changes in *SMAD* expression over an arbitrary period of time are represented in the graphs. Purple line: median of all prostate tumors from AA men. Blue line: median of all prostate tumors from EA men. Solid line: before AR inhibition and dashed line: simulation of AR inhibition. Solid line: before AR inhibition and dashed line: simulation of AR inhibition. *Left panel*: Roswell Park cohort, *Right panel*: TCGA cohort.

**Figure S7 Race comparisons reveal distinct gene enrichments that correlate with progression-free survival in early-onset disease. A.** Gene set enrichment analysis of differentially expressed genes between EA and AA patients from the TCGA cohort. **B.** Age-

specific comparisons show the common and distinct pathways in prostate tumors. **C.** Number of differentially expressed genes for each comparison (Early AA vs. EA, Elderly EA vs. AA, Early vs. Elderly EA, Early vs. Elderly AA) and number of genes which overlapped between the four comparisons. **D.** Comparisons of prostate tumors from EA men younger than 55 and EA men  $\geq 55$  years. *Left* panel represent differentially expressed genes utilizing DESeq2, *Middle* panel represent gene set enrichment analysis based on clusterProfiler, and *Right* panel represent hazard ratios based on calculated GSVA scores.
